# Supplementary material for: Ecological adaptations of Justicia adhatoda L. against environmental constraints: Strategies for survival and sustainability
Source: Research Square preprint supplement (doi:10.21203/rs.3.rs-7177412/v1), 2025-08-25
Supplement: Supplementary file 1 [file 348d9990956e112c8494b81a.docx]

| Region | District | Site | Min Annual Temp (◦C) | Max Annual Temp (◦C) | Rainfall | Elevation | Soil Texture |
| --- | --- | --- | --- | --- | --- | --- | --- |
| Dry Mountains | Jehlum | PU | 1 | 38 | 853 | 590 | SL |
|  | Jehlum | BR | 2 | 29 | 840 | 544 | SL |
|  | Chakwal | KT | 4.2 | 35 | 608 | 696 | SL |
|  | Chakwal | NW | 4.6 | 44 | 699 | 570 | SL |
|  | Khushab | AH | 5.3 | 48 | 685 | 184 | Loam |
|  | Khushab | KS | 5.5 | 38 | 650 | 225 | Loam |
|  | Khushab | KM | 5 | 38 | 632 | 730 | Loam |
| Mountains Valley | Khushab | PD | 5.1 | 40 | 612 | 807 | SL |
|  | Khushab | JB | 5.2 | 47 | 575 | 646 | SL |
| Saline areas | Jehlum | KW | 2.5 | 37 | 829 | 290 | SL |
|  | Khushab | KL | 5 | 36 | 608 | 743 | SL |
|  | Khushab | KK | 6 | 41 | 485 | 608 | SL |
| Road side | Chakwal | CS | 6.4 | 29 | 518 | 634 | SL |
|  | Chakwal | BU | 6.1 | 25 | 550 | 840 | SL |
|  | Chakwal | MN | 6.6 | 22 | 590 | 876 | SL |
|  | Faisalabad | FD | 4 | 46 | 375 | 185 | SL |

**Table 1: Environment attributes of *Justicia adhatoda* L. in different habitats**

Means sharing the same letters are statistically non-significant at P≤0.05

**Sites:** Phulgran (PHU), Barakhu (BAR), Khewra (KHW), Choa Sidn Shah (CSS), Katas (KAT), Ahmedabad (AHA), Khabeki Lake (KBL), Kallar Kahar (KKR) and Jabba (JAB). **Environmental variables:** Minimum Annual Temp (◦C), Maximum Annual Temp (◦C), Rainfall, Elevation (m). **Mountains [**Phulgran **(PU),** Barakhu **(BR), Katas (KT),** Neelawahn **(NW),** Ahmadabad **(AH),** Katha Sargral **(KS) and** Katha mountains **(KM), Mountains Valley [**Padhrar **(PD) and** Jabba **(JB), Saline areas [**Khewra **(KW),** Khabeki lake **(KL) and** Kallar khar **(KK), Roadside [Choa sidan shah (CS), Buchal (BU), Munara (MN) and Faisalabad (FD).**

**Table 2a: Stem anatomical attributes (Dermal and ground tissues) of *Justicia adhatoda* L. in different habitats**

| Region | Site | S EPI CA  µm2 | S EPI T  µm | S COR A  µm2 | S COR T  (µm) | S ScT  (µm) |
| --- | --- | --- | --- | --- | --- | --- |
| Dry Mountains | **PU** | 128+5.8fg | 6.4+0.31de | 114+12.13ef | 197+14.54fg | 11.7+0.45gh |
| **BR** | 164+5.63ab | 7.1+0.23bc | 100+9.64g | 438+16.76a | 18.2+0.45c |
| **KT** | 144+8.41de | 6.7+0.37cd | 100+7.23g | 212+14.48fg | 14.5+0.39f |
| **NW** | 156+4.74bc | 6.8+0.22bc | 146+9.64cd | 152+6.122hi | 16.9+0.40de |
| **AH** | 140+6.72ef | 6.5+0.21de | 157+9.74c | 118+14.45ij | 13.3+0.56f |
| **KS** | 161+6.91bc | 6.6+0.34d | 107+7.74fg | 128+7.94ij | 17.8+0.29cd |
| **KM** | 168+4.9ab | 7.5+0.28ab | 136+7.36cd | 186+12.04gh | 7.5+0.6JK |
| Mountains Valley | **PD** | 99+5.91ij | 5.7+0.29ef | 120+6.06ef | 398+15.98ab | 8.6+0.37ij |
| **JB** | 85+5.8j | 5.5+0.33gh | 117+7.23ef | 360+22.52bc | 21+0.37B |
| Saline areas | **KW** | 173+4.9a | 7.5+0.19ab | 186+6.06ab | 118+12.14jk | 7+0.6k |
| **KL** | 150+8.1cd | 6.9+0.39bc | 161+6.06bc | 110+8.11jk | 16+0.35e |
| **KK** | 176+7.2a | 7.6+0.27a | 201+9.74a | 95+ 8.20k | 23+0.37a |
| Road side | **CS** | 91+3.42ij | 5.6+0.32fg | 107+8.46fg | 347+11.10cd | 19+0.41c |
| **BU** | 118+6.2gh | 5.8+0.26ef | 111+13.27ef | 285+22.33e | 10.5+0.45gh |
| **MN** | 106+4.3ij | 5.7+0.28ef | 113+6.37ef | 234+15.79f | 9.3+0.34i |
| **FD** | 93+4.2hi | 4.9+0.19h | 131+8.46de | 312+12.56de | 9+0.51hi |
| LSD 5% | | 17.18 | 0.79 | 53.17 | 25.04 | 1.279 |

Means sharing the same letters are statistically non-significant at P≤0.05

**Mountains [**Phulgran **(PU),** Barakhu **(BR), Katas (KT),** Neelawahn **(NW),** Ahmadabad **(AH),** Katha Sargral **(KS) and** Katha mountains **(KM), Mountains Valley [**Padhrar **(PD) and** Jabba **(JB), Saline areas [**Khewra **(KW),** Khabeki lake **(KL) and** Kallar khar **(KK), Roadside [Choa sidan shah (CS), Buchal (BU), Munara (MN) and Faisalabad (FD). Stem anatomical attributes: Stem epidermal cell area (**S EPI CAµm2**), Stem epidermal thickness (**S EPI T µm**), Stem Cortical cell area (**S COR Aµm2**) and Stem sclerenchyma thickness S ScT µm).**

**Table 2b: Stem anatomical attributes (Vascular tissues) of *Justicia adhatoda* L. in different habitats**

| Region | Site | S VSN | S VBA  (µm2) | S Ph T  (µm) | S PX CA  µm2 | S MX A  µm2 |
| --- | --- | --- | --- | --- | --- | --- |
| Mountains | **PU** | 124+2.33hi | 515+39.17de | 64+2.21fg | 197+14.54fg | 343.40+22.27gh |
| **BR** | 146+3.53cd | 529+29.43de | 65+2.51fg | 438+16.76a | 523.39+16.77cd |
| **KT** | 148+4.10cd | 511+8.09de | 70+4.01f | 212+14.48fg | 473.48+34.91fg |
| **NW** | 138+3.76ef | 468+35.15fg | 85+2.89e | 152+6.122hi | 449.99+35.29e |
| **AH** | 141+3.76de | 446+2.59gh | 90+3.79de | 118+14.45ij | 468.57+31.58f |
| **KS** | 135+3.48fg | 483+17.73ef | 94+1.20d | 128+7.94ij | 499.65+20.10de |
| **KM** | 130+1.76gh | 624+5.98ef | 104+4.04c | 185.62+12.04gh | 220.61+16.23jk |
| Mountains Valley | **PD** | 87+2.90k | 624+28.17ab | 34+2.89k | 398.13+15.98ab | 236.61+24.28ij |
| **JB** | 85+2.08k | 609+38.49ab | 41+2.31jk | 360.045+22.52bc | 141.96+12.30k |
| Saline areas | **KW** | 158+4.41b | 394+21.79hi | 132+ 4.17a | 118.31+12.14jk | 597.20+23.97ab |
| **KL** | 153+3.38bc | 372+13.94i | 128+2.08ab | 110.31+8.11jk | 576.07+36.03bc |
| **KK** | 175+2.89a | 445+8.07gh | 119+ 2.90b | 94.64+ 8.20k | 613.01+23.47a |
| Roadside | **CS** | 154+3.28bc | 548+28.29cd | 58+3.76gh | 346.61+11.10cd | 423.90+28.97fg |
| **BU** | 99+5.78j | 460+11.80fg | 56+3.468ij | 284.80+22.33e | 380.72+15.30hi |
| **MN** | 102+4.33j | 576+35.52bc | 43+2.64hi | 234.28+15.79f | 242.21+25.30ij |
| **FD** | 117+2.64i | 678+26.31a | 50+3.76jk | 312.28+12.56de | 282.50+17.48ij |
| LSD 5% | | 10.18 | 74.08 | 9.07 | 40.89 | 40.8 |

Means sharing the same letters are statistically non-significant at P≤0.05

**Mountains [**Phulgran **(PU),** Barakhu **(BR), Katas (KT),** Neelawahn **(NW),** Ahmadabad **(AH),** Katha Sargral **(KS) and** Katha mountains **(KM), Mountains Valley [**Padhrar **(PD) and** Jabba **(JB), Saline areas [**Khewra **(KW),** Khabeki lake **(KL) and** Kallar khar **(KK), Roadside [Choa sidan shah (CS), Buchal (BU), Munara (MN) and Faisalabad (FD). Stem anatomical attributes: Stem vessel number (**S VSN**), Stem vascular bundle area (**S VBA µm2**), Stem phloem thickness (**S Ph T µm**), Stem protoxylem cell area (**S PX CA µm2**), Stem metaxylem cell area (**S MX A µm2**)**

**Table 3: Stem anatomical attributes (Vascular tissues) of *Justicia adhatoda* L. in different habitats**

| Region | Site | SA  µm2 | SR  µm | S ChT  µm | PCA  µm2 | XPR |
| --- | --- | --- | --- | --- | --- | --- |
| Mountains | **PU** | 1517+43.64cd | 758.5+21.82cd | 89.37+6.91h | 310.19+11.56e | 5.41+0.34gh |
| **BR** | 1021+66.46h | 510.5+33.17h | 92.43+7.63gh | 376.83+31.47d | 5.06+0.21cd |
| **KT** | 1410+41.12de | 705+20.6de | 92.01+7.41gh | 430.17+12.05ab | 5.33+0.61fg |
| **NW** | 1295+19.41fg | 647+9.6fg | 95.91+7.951fg | 172.68+7.37h | 5.36+0.60de |
| **AH** | 1457+53.77cd | 728+26.88cd | 99.941+8.32ef | 264.53+13.67ef | 7.24+0.75e |
| **KS** | 1218+37.97g | 609+ 19.10g | 102.026+7.55de | 220.23+19.39gh | 5.30+0.25de |
| **KM** | 1869+58.38a | 934+29.19a | 105.64+6.36cd | 229.88+15.79fg | 5.32+0.09jk |
| Mountains Valley | **PD** | 739+27.56i | 369+13.86i | 81.176+6.19i | 283.21+24.52e | 4.7+0.13jk |
| **JB** | 745+56.82i | 372+28.47i | 80.89+6.06i | 421.50+9.76bc | 4.68+0.26ab |
| Saline areas | **KW** | 1971+60.11a | 985+30.05a | 110.22+5.73b | 476.42+20.55a | 4.21+0.54k |
| **KL** | 1345+19.82ef | 672+9.97h | 107.03+5.88bc | 414.83+15.14cd | 6.07+0.45f |
| **KK** | 1862+52.38a | 931+26.19a | 135.38+8.09a | 473.50+32.24ab | 4.63+0.19a |
| Roadside | **CS** | 1000+30.05h | 500+14.93h | 77.28+5.38i | 381.83+21.11cd | 4.83+0.18bc |
| **BU** | 1578+53.76bc | 789+26.88bc | 70.47+4.01j | 169.68+14.21h | 6.55+0.30hi |
| **MN** | 1672+32.94b | 836+16.47b | 57.96+1.03k | 196.33+12.06gh | 4.41+0.607ij |
| **FD** | 1578+53.76bc | 789+26.88bc | 56.01+0.97k | 186.23+12.03gh | 6.57+0.61ij |
| LSD 5% | | 66.94 | 32.80 | 4.28 | 53.18 | 1.25 |

Means sharing the same letters are statistically non-significant at P≤0.05

**Mountains [**Phulgran **(PU),** Barakhu **(BR), Katas (KT),** Neelawahn **(NW),** Ahmadabad **(AH),** Katha Sargral **(KS) and** Katha mountains **(KM), Mountains Valley [**Padhrar **(PD) and** Jabba **(JB), Saline areas [**Khewra **(KW),** Khabeki lake **(KL) and** Kallar khar **(KK), Roadside [Choa sidan shah (CS), Buchal (BU), Munara (MN) and Faisalabad (FD). Stem anatomical attributes: Stem area (**SA µm2**), Stem radius (**SR µm**), Stem collenchyma thickness (**S ChT µm**), Pith cell area (**PCA µm2**), Xylem to phloem ratio (**XPR**).**
